# Supplementary material
Source: bioRxiv or medRxiv preprint supplement (https://www.biorxiv.org/highwire/filestream/106836/field_highwire_adjunct_files/2/352302-3.pdf)
Supplement: Supplementary file [file 352302-3.pdf]

### Fully connected 2-node network

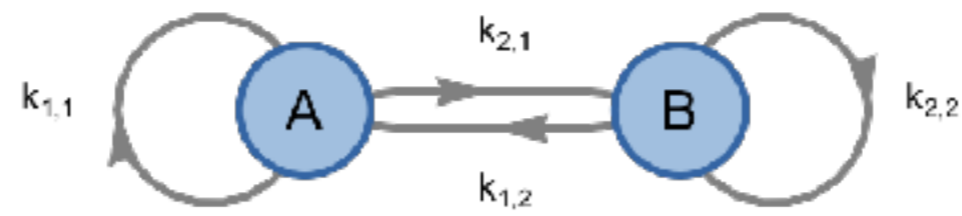

### Parameters used to produce patterns in Figure 3D

|           | ID | $V_1$  | $V_2$  | $k_{1,1}$ | $k_{2,1}$ | $k_{1,2}$ | $k_{2,2}$ | $b_1$ | $b_2$  | $\mu_1$ | $\mu_2$ | $d_1$ | $d_2$ |
|-----------|----|--------|--------|-----------|-----------|-----------|-----------|-------|--------|---------|---------|-------|-------|
| non-comp. | 8  | 3.1623 | 3.1623 | 100       | 100       | 100       | 0         | 0.1   | 0.1    | 0.01    | 0.01    | 1     | 100   |
|           | 9  | 3.1623 | 100    | 100       | 3.1623    | 3.1623    | 0         | 0.1   | 0.1    | 0.01    | 0.1     | 1     | 1000  |
|           | 15 | 100    | 3.1623 | 3.1623    | 3.1623    | 0.1       | 100       | 0.1   | 0.1    | 1       | 1       | 1     | 100   |
|           | 16 | 3.1623 | 100    | 100       | 3.1623    | 3.1623    | 100       | 0.1   | 0.1    | 0.01    | 0.1     | 1     | 1000  |
|           | 20 | 3.1623 | 3.1623 | 100       | 100       | 100       | 0.1       | 0.1   | 0.1    | 0.01    | 0.01    | 1     | 100   |
| comp.     | 8  | 3.1623 | 3.1623 | 0.1       | 100       | 0.1       | 0         | 0.1   | 0.1    | 0.01    | 0.01    | 1     | 1000  |
|           | 5  | 3.1623 | 3.1623 | 100       | 100       | 100       | 100       | 0.1   | 0.1    | 0.01    | 0.01    | 1     | 1000  |
|           | 20 | 100    | 100    | 3.1623    | 3.1623    | 3.1623    | 100       | 0.1   | 3.1623 | 1       | 1       | 1     | 100   |

### Parameters used to produce patterns in Figure 4D

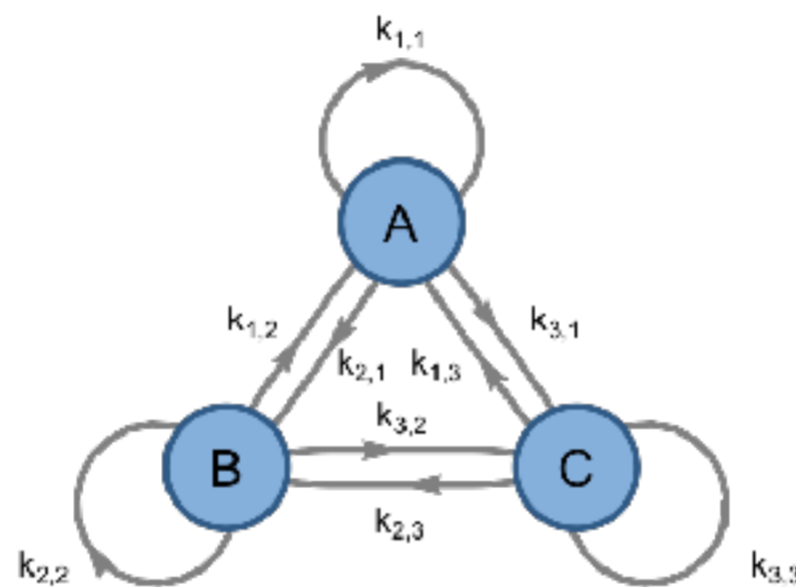

### Parameters used to produce patterns in Figure 6D

|                    | ID   | $k_{1,1}$ | $k_{2,1}$ | $k_{3,1}$ | $k_{1,2}$ | $k_{2,2}$ | $k_{3,2}$ | $k_{1,3}$ | $k_{2,3}$ | $k_{3,3}$ | $\mu_1$ | $\mu_2$ | $\mu_3$ | $d_1$ | $d_2$ | $d_3$ |
|--------------------|------|-----------|-----------|-----------|-----------|-----------|-----------|-----------|-----------|-----------|---------|---------|---------|-------|-------|-------|
| Turing Ia          | 1518 | 100       | 100       | 3.1623    | 100       | 0         | 0.1       | 0         | 100       | 0         | 0       | 0       | 0       | 1     | 100   | 0     |
| Turing Ib          | 151  | 100       | 100       | 100       | 3.1623    | 0         | 0         | 100       | 0         | 0         | 0       | 0       | 0       | 1     | 0.001 | 0     |
| Turing IIa         | 16   | 100       | 3.1623    | 0         | 0         | 0         | 0.1       | 3.1623    | 0         | 0         | 0       | 0       | 0       | 1     | 0.001 | 0     |
| Turing IIb         | 180  | 3.1623    | 3.1623    | 3.1623    | 100       | 0         | 0         | 100       | 0         | 0         | 0       | 0       | 0       | 1     | 0.001 | 0     |
| multistable case 1 | 3550 | 3.1623    | 3.1623    | 0.1       | 3.1623    | 100       | 0         | 0         | 3.1623    | 3.1623    | 0       | 0       | 0       | 1     | 1000  | 0.1   |
| multistable case 2 | 688  | 0         | 3.1623    | 3.1623    | 3.1623    | 0         | 100       | 3.1623    | 0         | 0         | 0       | 0       | 0       | 1     | 10    | 0     |

### Parameters used to produce patterns in Figure 7D

|          | ID   | $k_{1,1}$ | $k_{2,1}$ | $k_{3,1}$ | $k_{1,2}$ | $k_{2,2}$ | $k_{3,2}$ | $k_{1,3}$ | $k_{2,3}$ | $k_{3,3}$ | $\mu_1$ | $\mu_2$ | $\mu_3$ | $d_1$ | $d_2$ | $d_3$ |
|----------|------|-----------|-----------|-----------|-----------|-----------|-----------|-----------|-----------|-----------|---------|---------|---------|-------|-------|-------|
| Figure 6 | 4030 | 3.1623    | 100       | 100       | 3.1623    | 0         | 3.1623    | 0         | 3.1623    | 0.1       | 0       | 0       | 0       | 1     | 0.01  | 0     |
| Figure 7 | 1291 | 3.1623    | 100       | 0.1       | 3.1623    | 0         | 0.1       | 3.1623    | 0         | 0         | 0       | 0       | 0       | 1     | 100   | 0     |
